# Supplementary material
Source: PubMed Central journal article supplement (PMC8138872)
Supplement: NIHMS1692222-supplement-Figure_S1.pdf [file NIHMS1692222-supplement-Figure_S1.pdf]

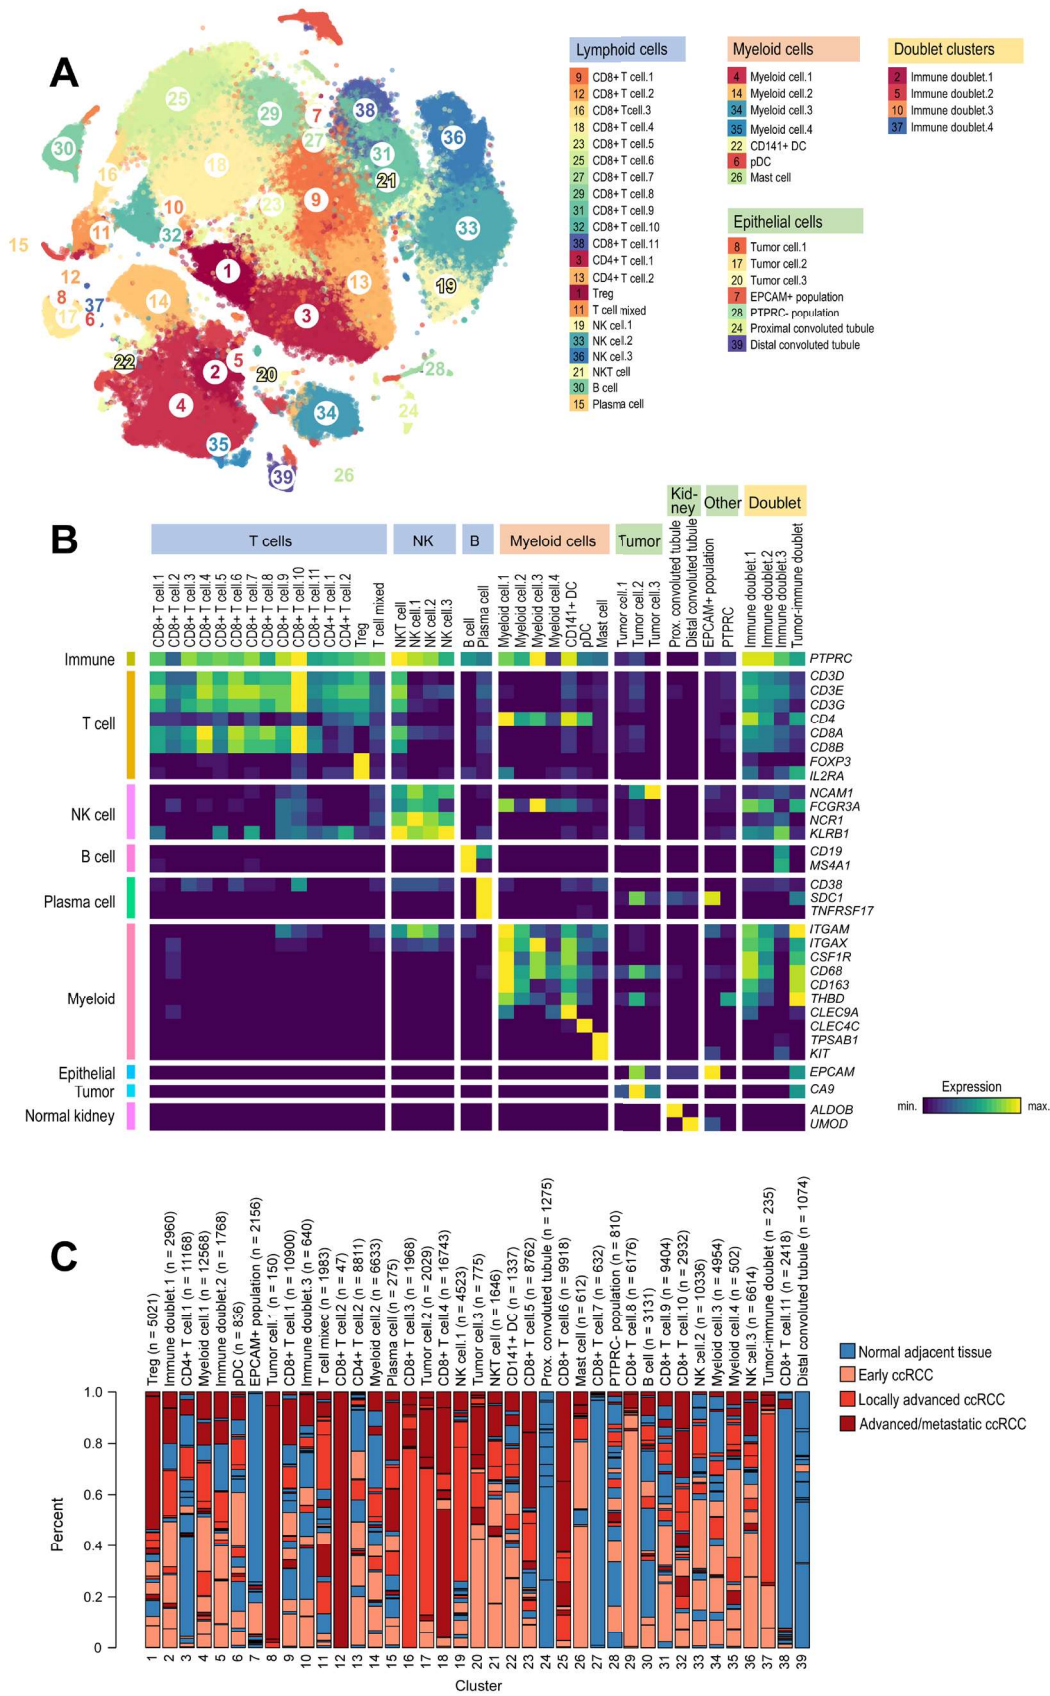

**Figure S1.** Individual cell populations identified through scRNA-seq, related to **Figure 1**. **(A)** tSNE representation of scRNA-seq data, with labeling of each cell populations. **(B)** Heatmap of cell lineage and functional markers provides phenotypic information for individual cell populations. Expression values are scaled between minimum and maximum expression for each gene across all clusters. **(C)** Representation of each sample within each cell cluster, colored by tissue of origin.
