# Supplementary material
Source: PubMed Central journal article supplement (PMC8138872)
Supplement: NIHMS1692222-supplement-Figure_S3.pdf [file NIHMS1692222-supplement-Figure_S3.pdf]

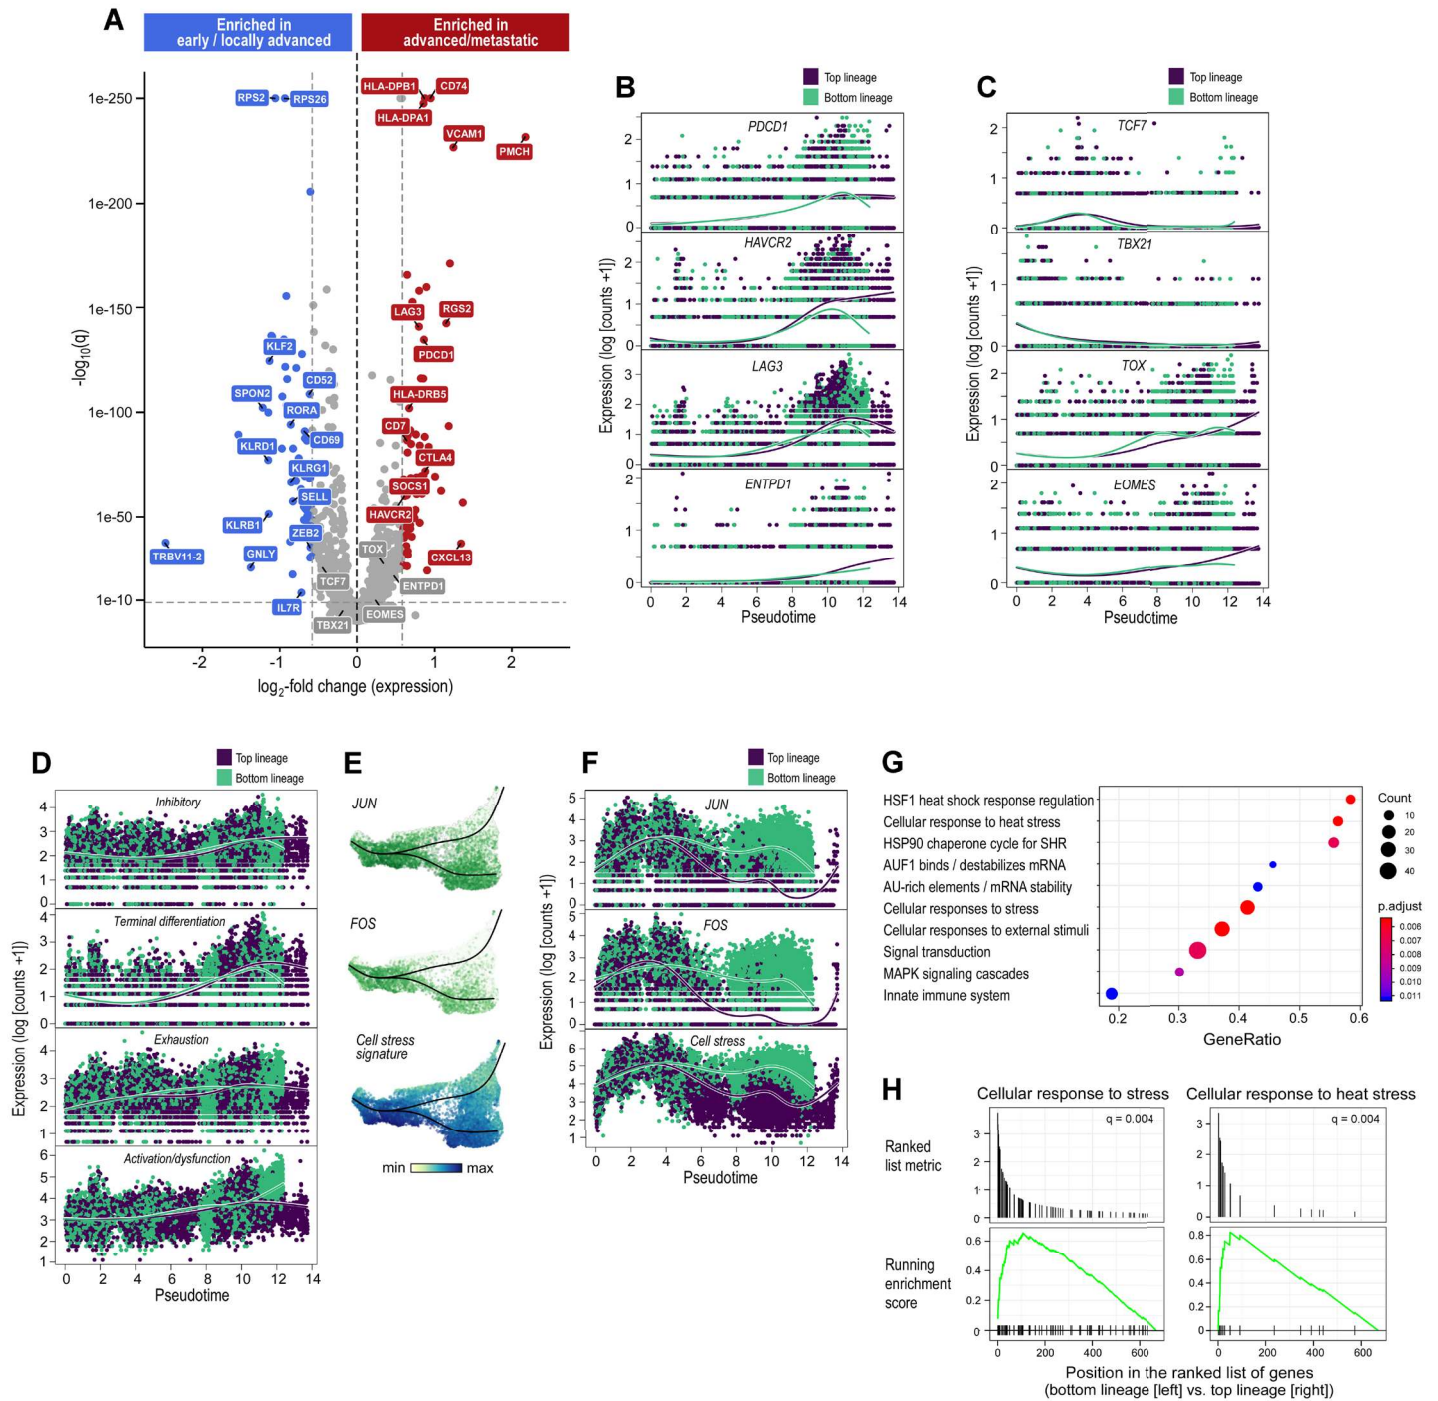

**Figure S3.** Markers of T cell exhaustion are increased in CD8<sup>+</sup> T cells later in pseudotime, corresponding to cells from advanced/metastatic disease, related to **Figure 3**. **(A)** Volcano plot of differentially expressed genes (edgeR) between CD8<sup>+</sup> T cells from metastatic disease vs those from early and locally advanced disease (thresholds: at least 1.5-fold change, and q value less than  $10^{-10}$ ). TradeSeq plots showing both the average expression pattern and individual cell expression values for **(B)** T cell inhibitory checkpoint genes, **(C)** transcription factor genes related to progenitor-like and terminally exhausted states, and **(D)** signatures of T cell exhaustion and terminal differentiation. The expression of genes and a signature associated with cell stress are different between the trajectory branches, as shown in the **(E)** feature plots and **(F)** TradeSeq plots. **(G)** Gene set enrichment analysis showing top Reactome pathways enriched in the different CD8<sup>+</sup> T cell trajectory branches, demonstrating that the differences are mostly driven by differential expression of genes relating to cell stress, likely as a technical artifact. **(H)** Example gene set enrichment analysis of two top pathways that were different in the two trajectory branches.
